# Supplementary material for: Mg-doped OMS-2 nanorods: a highly efficient catalyst for purification of volatile organic compounds with full solar spectrum irradiation
Source: Royal Society of Chemistry journal article supplement (doi:10.1039/c7en00567a), 2017-01-01
Supplement: c7en00567a1.pdf [file c7en00567a1.pdf]

## Supporting information

### Mg doped OMS-2 nanorod: A highly efficient catalyst for purification of volatile organic compounds with full solar spectrum irradiation

*Shiming Fang, Yuanzhi Li,\* Yi Yang, Jian Chen, Huihui Liu, Xiujian Zhao*

State Key Laboratory of Silicate Materials for Architectures, Wuhan University of Technology, 122 Luoshi Road, Wuhan 430070, P. R. China. E-mail: liyuanzhi66@hotmail.com

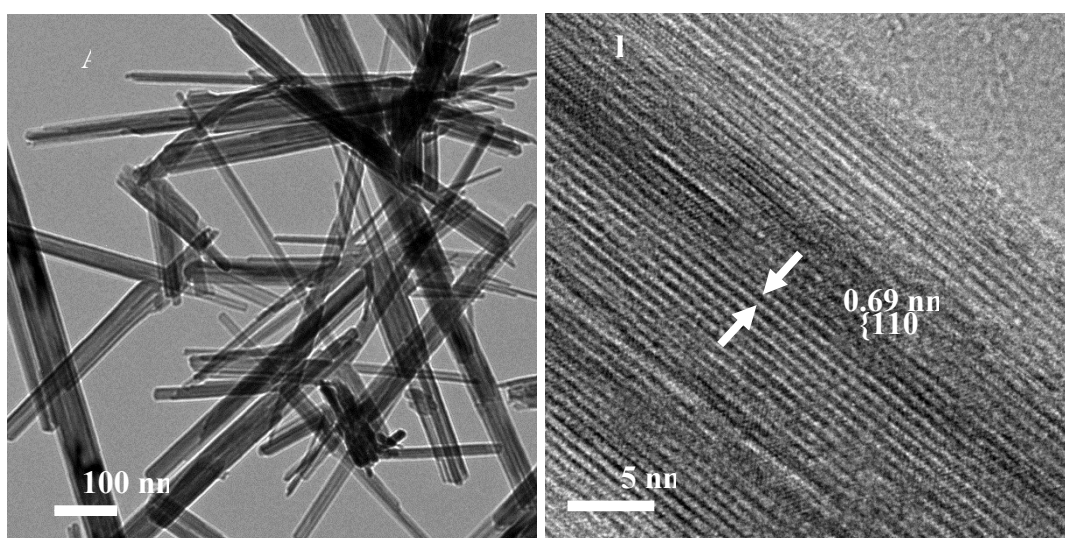

**Figure S1.** TEM (A) and HRTEM (B) images of the pure OMS-2 sample.

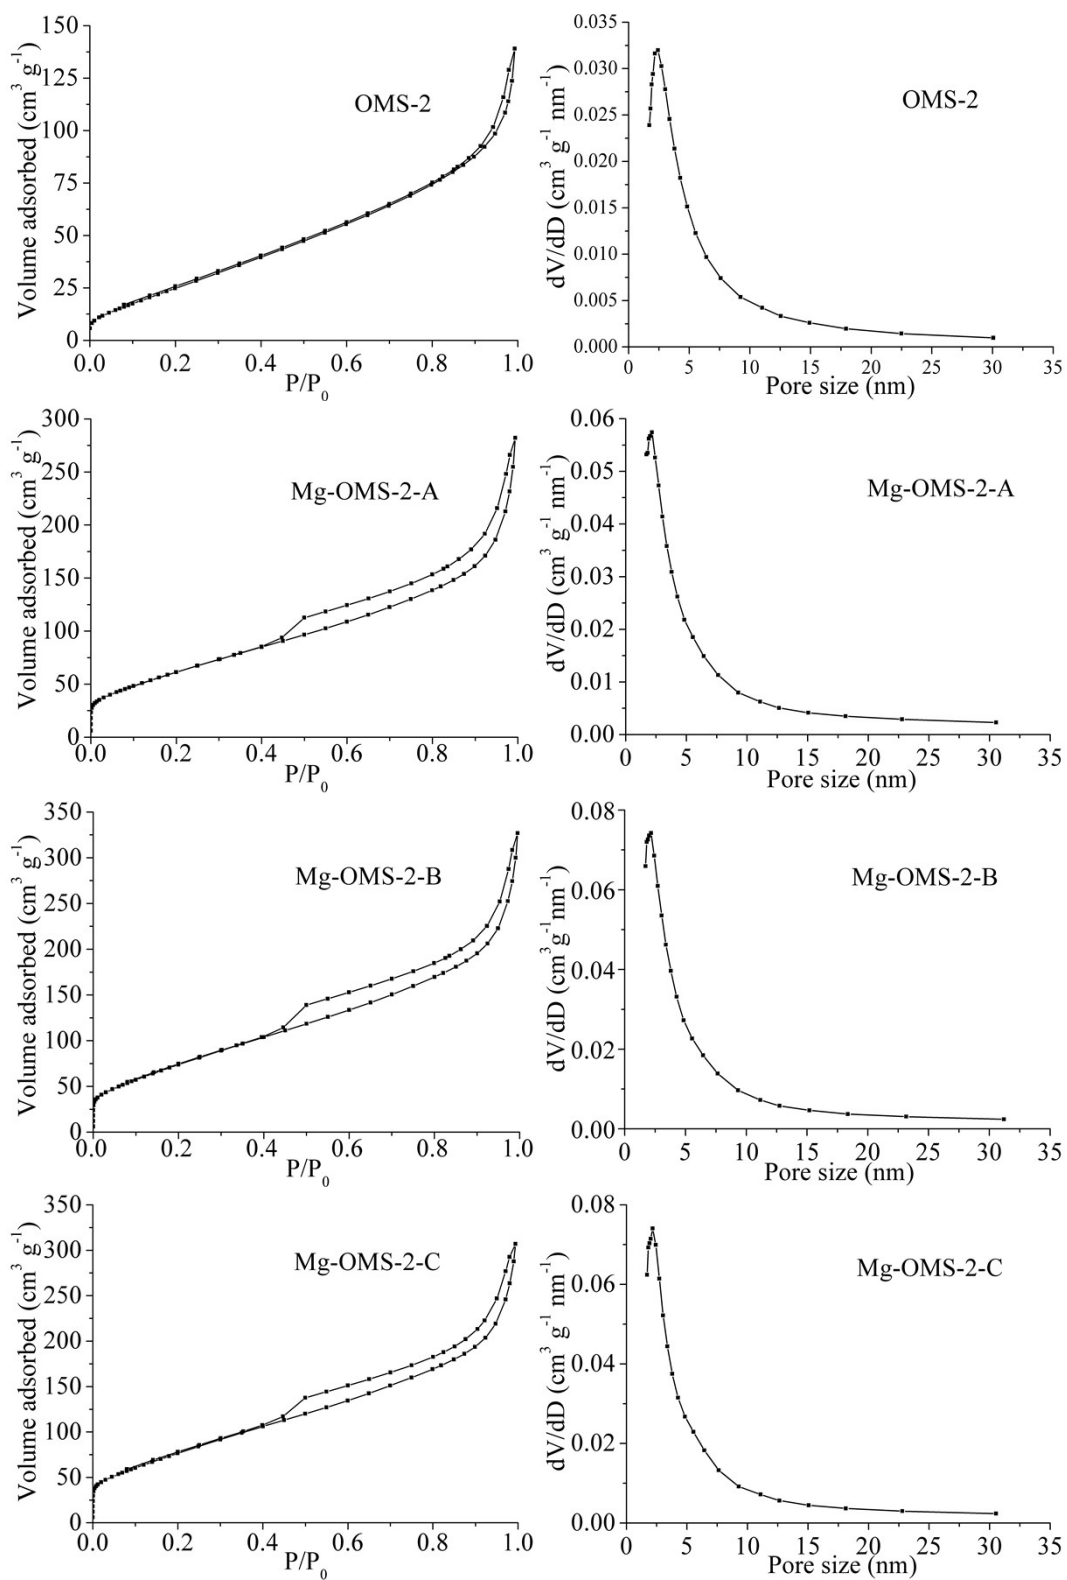

**Figure S2.**  $N_2$  adsorption-desorption isotherm and BJH adsorption pore size distribution of the samples of OMS-2 and Mg doped OMS-2.
